# Supplementary material
Source: Springer Nature journal article supplement (https://www.springermedizin.de/resource/supplementary/12961_2009_96_MOESM1_ESM.pdf/9571406)
Supplement: MOESM1 [file 9571406]

***Relevance***

Rationales for priority setting decisions must rest on reasons (evidence and principles) that stakeholders can agree are relevant in the context. Only participation by the full range of stakeholders can ensure that the full range of relevant reasons are brought to the deliberations.

***Publicity***

Priority setting decisions and their rationales must be publicly accessible. Publicity means that leaders must take action to 'push' the message out to all segments of the public. Thus, publicity goes beyond mere transparency.

***Revisions***

There must be a mechanism for challenge, including the opportunity for revising decisions in light of considerations that stakeholders may raise. This provides a quality assurance mechanism to difficult, and occasionally controversial, decision making and demonstrates responsiveness on the part of leaders.

***Enforcement/Leadership***

Leaders in each context are responsible for ensuring that the first three conditions are met in their context.
